# Supplementary material for: AAV-BDNF gene therapy ameliorates a hypothalamic neuroinflammatory signature in the Magel2-null model of Prader-Willi syndrome
Source: PubMed Central journal article supplement — Mol Ther Methods Clin Dev. 2023 Sep 13;31:101108. doi: 10.1016/j.omtm.2023.09.004 (PMC10520877; doi:10.1016/j.omtm.2023.09.004), 2023-09-13
Supplement: mmc1.pdf [file mmc1.pdf]

OMTM, Volume 31

## Supplemental information

**AAV-BDNF gene therapy ameliorates a hypothalamic  
neuroinflammatory signature in the *Magel2*-null  
model of Prader-Willi syndrome**

Nicholas J. Queen, Wei Huang, Xunchang Zou, Xiaokui Mo, and Lei Cao

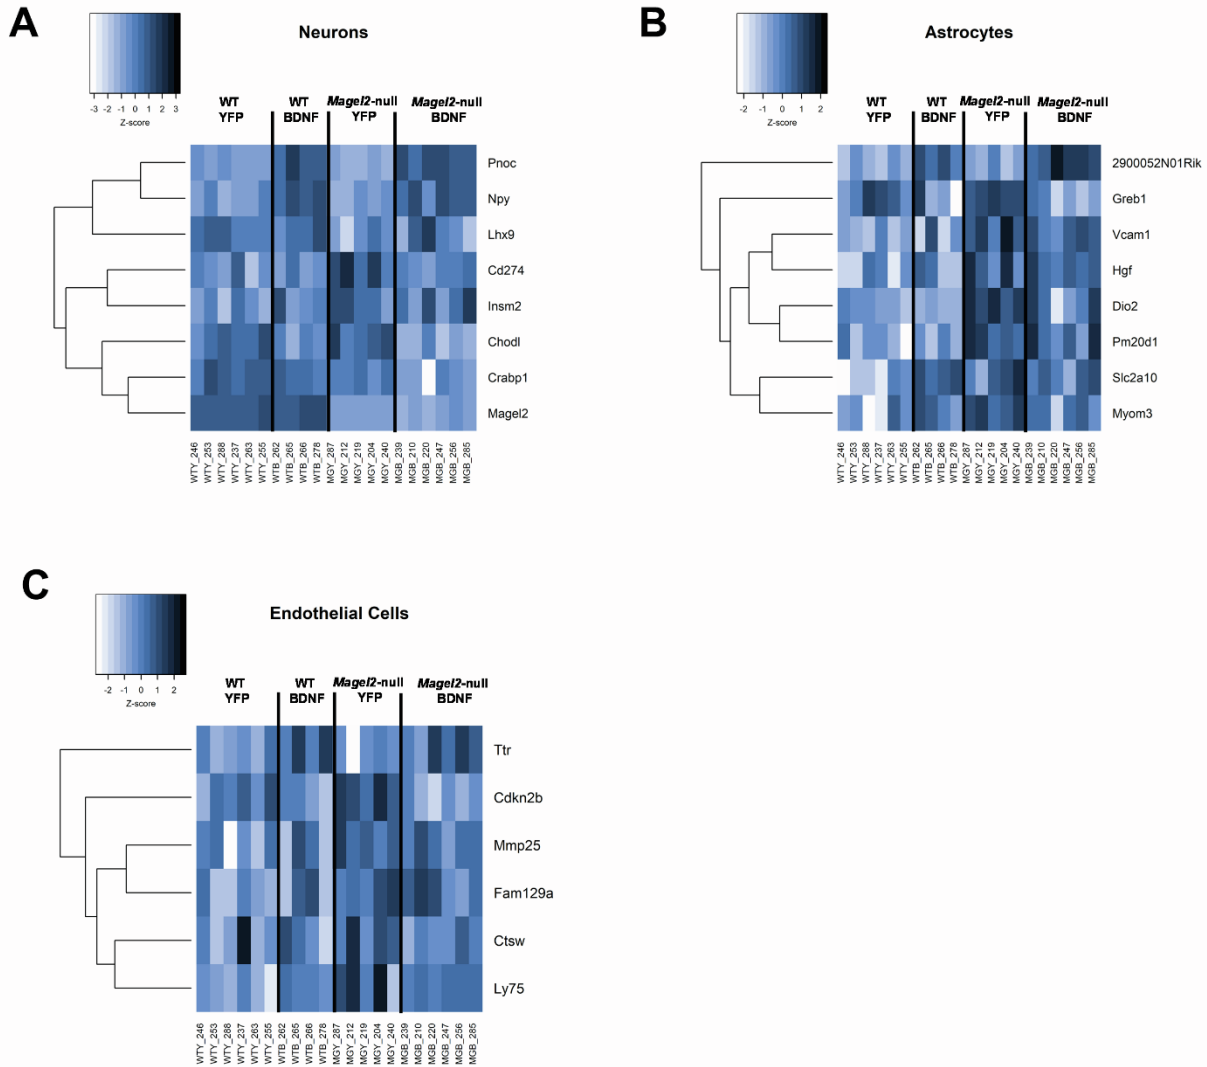

**Figure S1. Additional cell-specific markers were identified as differentially expressed genes (DEGs).** (A) Gene expression of putative neuron markers; all listed genes were identified as DEGs. (B) Gene expression of putative astrocyte markers; all listed genes were identified as DEGs. (C) Gene expression of putative endothelial cell markers; all listed genes were identified as DEGs. DEGs were identified using the following thresholds:  $\log_2[\text{fold change}] < -0.585$  or  $> 0.585$  (corresponding to fold change of 1.5), Q-value (or FDR p-value)  $< 0.05$ . Sample size: WT YFP n=6, WT BDNF n=4, *Magel2*-null YFP n=6, *Magel2*-null BDNF n=6.

**Table S1. DEGs for *Magel2*-null YFP vs WT YFP (genotype effect).**

See Excel file.

**Table S2. DEGs for *Magel2*-null BDNF vs. *Magel2*-null YFP (gene therapy effect).**

See Excel file.

**Table S3. IPA Canonical Pathways for *Magel2*-null YFP vs WT YFP (genotype effect).**

See Excel file.

**Table S4. IPA Canonical Pathways for *Magel2*-null BDNF vs *Magel2*-null YFP (gene therapy effect).**

See Excel file.

**Table S5.** Primer sequences used for qPCR.

| <b>Gene</b>    | <b>Sequence</b>                                       |
|----------------|-------------------------------------------------------|
| <i>Acacb</i>   | ATCCCTCCCTACCTCTGCTG<br>GGATGGTGGCTATCTGCTGG          |
| <i>Actinb</i>  | ACCCGCGAGCACAGCTT<br>ATATCGTCATCCATGGCGAACT           |
| <i>Adipoq</i>  | CCCTCCACCCAAGGGA ACT<br>CCATTGTGGCCAGGATGTC           |
| <i>Adrb3</i>   | GGACGCTGTTCTTTAAAAGCA<br>TCCATCTCACCCCCCATGT          |
| <i>Aim2</i>    | CTGGCCGCATAGTCATCCTT<br>AGTCCCAGGATCAGCCTAGA          |
| <i>BDNF</i>    | CCATAAGGACGCGGACTTGT<br>AGGCTCCAAGGCACTTGACT          |
| <i>Ccl2</i>    | GCTGTAGTTTTTGTACCAAGC<br>AAGGCATCACAGTCCGAGTC         |
| <i>Crh</i>     | TGGCCCCAAGGAGGAAA<br>CCACTGCAGCTCCAAATAAAAA           |
| <i>Cx3cr1</i>  | TCACCGTCATCAGCATCGAC<br>CGCCAGACTAATGGTGACA           |
| <i>Cxcl10</i>  | AAGTGCTGCCGTCATTTTCT<br>CTTCCCTATGGCCCTCATT           |
| <i>Glut4</i>   | TTATTGCAGCGCCTGAGTCT<br>GGGTTCCCATCGTCAGAG            |
| <i>Hprt1</i>   | TGTTGTTGGATATGCCCTTG<br>GCGCTCATCTTAGGCTTTGT          |
| <i>Hsl</i>     | GCGCCAGGACTGGAAAGAAT<br>TGAGAACGCTGAGGCTTTGAT         |
| <i>Lep</i>     | ATTCACACACGCAGTCGGTAT<br>AGCCAGGAATGAAGTCCAA          |
| <i>Mc4r</i>    | CACTGTGTCAGGCGTCCTCTT<br>ATGGAAATGAGGCAGATGATGA       |
| <i>Nfkbia</i>  | TGCCTGGCCAGTGTAGCAGTCTT<br>CAAAGTCACCAAGTGCTCCACGAT   |
| <i>Pparg</i>   | ATGGGTGAAACTCTGGGAGATTCA<br>CTTGGAGCTTCAGGTCATATTTGTA |
| <i>Pparg1a</i> | AAGTGTTGGA ACTCTCTGGA ACTG<br>GGGTTATCTTGGTTGGCTTTATG |
| <i>Pten</i>    | TGGATTCGACTTAGACTTGACCT<br>GCGGTGTCATAATGTCTCTCAG     |
| <i>Socs3</i>   | ATGGTCACCCACAGCAAGTTT<br>TCCAGTAGAATCCGCTCTCCT        |
| <i>Trem2</i>   | ACAGCACCTCCAGGAATCAAG<br>AACTTGCTCAGGAGAACGCA         |

|              |                                                 |
|--------------|-------------------------------------------------|
| <i>Ucp1</i>  | CGATGTCCATGTACACCAAGGA<br>CCCGAGTCGCAGAAAAGAAG  |
| <i>Vegfa</i> | TACCTCCACCATGCCAAGTG<br>CATGGGACTTCTGCTCTCCTTCT |
